# Supplementary material
Source: Springer Nature journal article supplement (https://www.springermedizin.de/resource/supplementary/12958_2009_604_MOESM4_ESM.pdf/9568080)

## HLA-DR

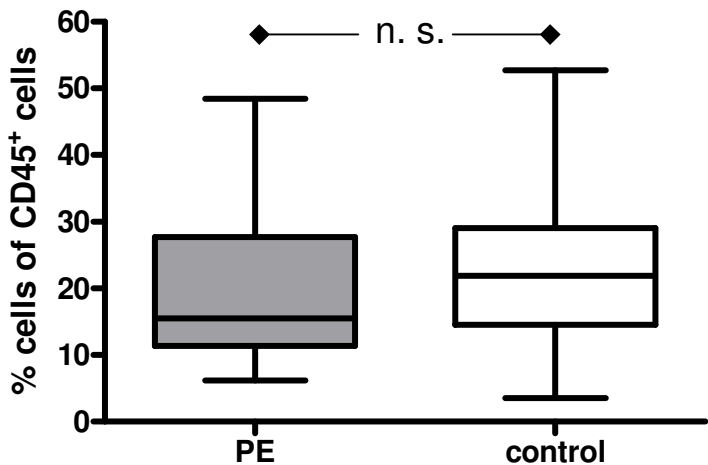

## DC-Sign

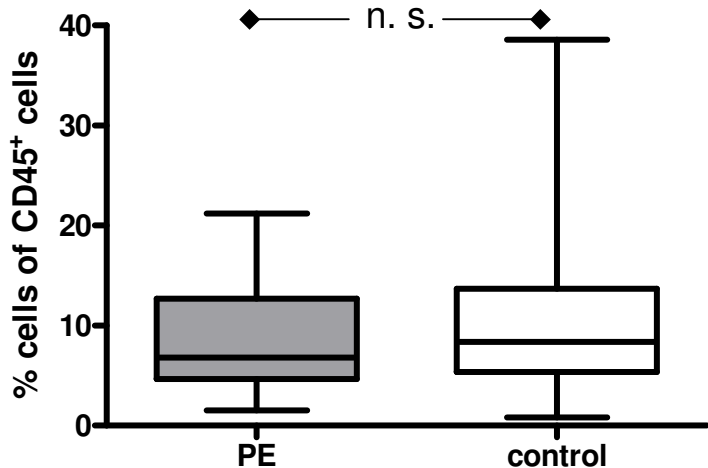

## CD14

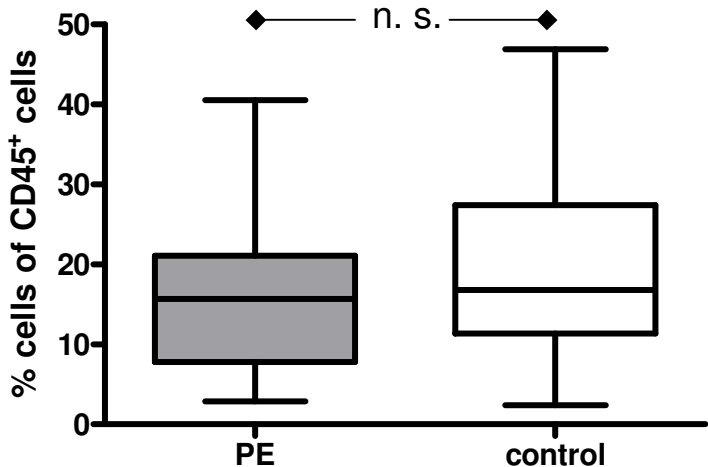

Supplement: MOESM4 [file 9568080]
